# Supplementary material for: Effects of attraction strength on microchannel flow of colloid–polymer depletion mixtures
Source: Royal Society of Chemistry journal article supplement (doi:10.1039/c2sm25935d), 2012-01-01
Supplement: c2sm25935d.pdf [file c2sm25935d.pdf]

## SUPPLEMENTARY INFORMATION

Movie S1: Microchannel flow of a colloidal suspension with a weak interparticle attraction ( $c_p = 5 \text{ mg/mL}$ ). The suspension flows at a volumetric rate of  $8 \mu\text{L/hr}$  in a microchannel with a square cross-sectional area ( $L = 100\mu\text{m}$ ); movie was acquired  $50 \mu\text{m}$  above the bottom surface of the microchannel (at the midplane) and  $20 \text{ mm}$  downstream from the channel entrance.

Movie S2: Microchannel flow of a colloidal suspension with a strong interparticle attraction ( $c_p = 25 \text{ mg/mL}$ ). The suspension flows at a volumetric rate of  $8 \mu\text{L/hr}$  in a microchannel with a square cross-sectional area ( $L = 100\mu\text{m}$ ); movie was acquired  $50 \mu\text{m}$  above the bottom surface of the microchannel (at the midplane) and  $20 \text{ mm}$  downstream from the channel entrance.

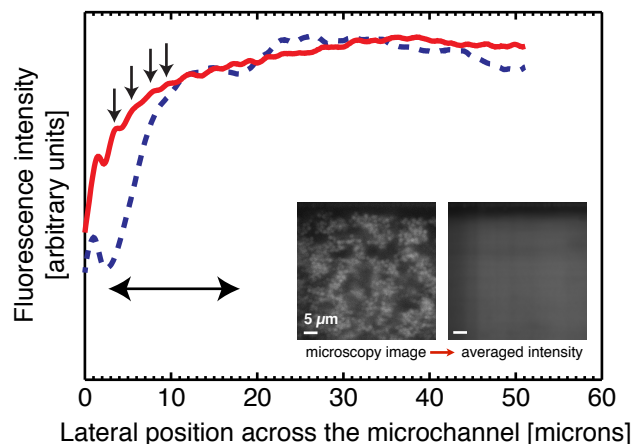

Figure S3: Fluorescence intensity as a function of lateral position for the weakly-attractive suspension ( $c_p = 5 \text{ mg/mL}$ , red solid line) and strongly-attractive suspension ( $c_p = 25 \text{ mg/mL}$ , blue dashed line), acquired at the midplane of the microchannel ( $50 \mu\text{m}$  above the bottom surface,  $z/L = 0.5$ ), acquired at a flow rate of  $8 \mu\text{L/hr}$ . The first maximum in each plot indicates the position of the edge of the microchannel. The periodic maxima in intensity in the profile of the weakly-attractive suspension (indicated by vertical arrows) correspond to layering of particles near the wall; the distance between the first two minima in the profile of the strongly-attractive suspension (indicated by the horizontal arrow) is the characteristic size of the clusters that yield near the wall. Inset: representative microscopy image and averaged image for the  $c_p = 25 \text{ mg/mL}$  sample during flow.
